# Supplementary material
Source: PubMed Central journal article supplement (PMC9304410)
Supplement: 41467_2022_31727_MOESM1_ESM.pdf [file 41467_2022_31727_MOESM1_ESM.pdf]

1  
2  
3  
4  
5

**Dynamic influences on static measures of metacognition**

Supplementary Information

Desender et al.

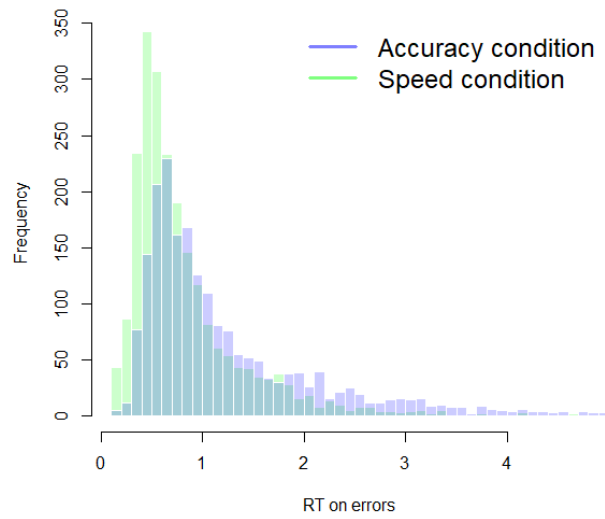

6  
7  
8  
9  
10  
11

**Supplementary Figure 1. Speed-accuracy tradeoff influences on error distributions.** The distribution of error RTs from Experiment 1, separately for the speed and the accuracy conditions reveals that our manipulation successfully induced more fast errors in the speed condition and more slow errors in the accuracy condition. Source data are provided as a Source Data file.

## 12 **Supplementary Note 1: Replicating the effect of speed-accuracy tradeoffs on M-ratio**

13 Here, we report the results of a replication study which was identical to Experiment 1 reported  
14 in the main manuscript, except that participants were instructed to provide confidence ratings on a  
15 continuous scale using the mouse (instead of with keyboard presses, as in Experiment 1). Although  
16 collecting confidence judgments with a continuous scale allows for a more fine-grained measurement  
17 of decision confidence, it comes at the cost that measurements of confidence RTs are less precise.  
18 Despite this methodological difference, results of this replication study were fully in line with those of  
19 Experiment 1.

20 In this replication study, we recruited 40 human participants (18 males, mean age = 19.82,  
21 between 18 and 30). Two participants were excluded because they required more than 10 practice  
22 blocks in one of the training blocks, and six participants were excluded because their choice accuracy  
23 was not different from chance level performance in at least one of both instruction conditions, as  
24 assessed by a chi square test. The final sample thus comprised thirty-two participants. The task was  
25 identical to Experiment 1, except for the following. Participants made a choice by pressing “E” or “T”  
26 with their left hand, corresponding to left and right choices, respectively. After the choice, and a blank  
27 screen of .5s, participants indicated their level of confidence using a continuous slider (see  
28 Supplementary Figure 2A). Consistent with the instructions, participants were faster in the speed  
29 condition than in the accuracy condition,  $M_{speed} = 738\text{ms}$  versus  $M_{accuracy} = 992\text{ms}$ ,  $t(31) = 4.12$ ,  $p <$   
30  $.001$ , and numerically more accurate in the accuracy condition than in the speed condition,  $M_{accuracy} =$   
31  $77.6\%$  vs  $M_{speed} = 76.0\%$ ,  $t(31) = 1.31$ ,  $p = .20$ . To test whether indeed errors in the speed condition  
32 were mostly “fast” errors and errors in the accuracy condition were mostly “slow” errors, despite a  
33 significant difference in overall error rate, we divided each participant’s error RTs into three equal-  
34 sized bins (fast, medium or slow). We observed that in the fast bin there were more errors from the  
35 speed than from the accuracy condition ( $M_{speed} = 30.3$  trials vs  $M_{accuracy} = 14.0$  trials,  $t(31) = -5.73$ ,  $p <$   
36  $.001$ ), whereas in the slow bin the reverse was true ( $M_{speed} = 17.1$  trials vs  $M_{accuracy} = 27.9$  trials,  $t(31) =$   
37  $5.72$ ,  $p < .001$ ). In the medium bin the number of trials did not differ between both instruction conditions  
38 ( $M_{speed} = 21.8$  trials vs  $M_{accuracy} = 22.7$  trials,  $p = .592$ ). Confidence RTs were not significantly different  
39 between the two instruction conditions,  $p = .249$ , suggesting participants selectively varied response  
40 caution for the motion coherence choice. The data further showed no significant between-participants  
41 correlations between median choice RTs and median confidence RTs in the accuracy condition,  $r(30)$   
42  $= .325$ ,  $p = .069$ , nor in the speed condition,  $r(34) = .08$ ,  $p = .668$ . Finally, participants were more  
43 confident in the accuracy condition than in the speed condition,  $M_{accuracy} = 71$  versus  $M_{speed} = 68$ ,  $t(31)$   
44  $= 3.04$ ,  $p = .004$  (See Figure Supplementary Figure 2D).

45 Our bounded accumulation fitted the data well, as it captured the distributional properties of  
46 both reaction times and decision confidence (see Supplementary Figure 2C). As expected, decision  
47 boundaries were different between the two instruction conditions,  $M_{speed} = 1.47$  versus  $M_{accuracy} = 1.83$ ,  
48  $t(31) = 3.95$ ,  $p < .001$ , suggesting that participants changed their decision boundaries as instructed.  
49 Also non-decision time tended to be a bit shorter in the speed condition compared to the accuracy  
50 condition,  $M_{speed} = 295\text{ms}$  versus  $M_{accuracy} = 367\text{ms}$ ,  $t(31) = 2.33$ ,  $p = .026$ . Drift rates did not differ  
51 between both instruction conditions,  $p = .207$ . There was a small but significant difference between the  
52 two instruction conditions in the two additional parameters controlling the idiosyncratic mapping  
53 between  $p(\text{correct})$  and the confidence scale, reflecting that in the accuracy condition confidence  
54 judgments were slightly higher,  $t(31) = 3.86$ ,  $p < .001$ , and less variable,  $t(31) = 2.68$ ,  $p = .012$ ,  
55 compared to the speed condition. Because confidence was expressed on a continuous scale, before  
56 fitting the meta- $d'$  model (which requires categorical confidence judgments) confidence was divided  
57 into 4 equal-sized bins, separately for each participant. When trial counts were too imbalanced to  
58 create equal-sized bins, less bins were created. In line with the model simulations, our data showed  
59 that M-ratio was significantly affected by the speed-accuracy tradeoff instructions,  $M_{speed} = 0.66$  versus  
60  $M_{accuracy} = 0.46$ ,  $t(31) = 2.95$ ,  $p = .005$  (Supplementary Figure 2B). Consistent with the notion that

61 metacognitive accuracy should not be affected by differences in decision boundary, v-ratio did not  
 62 differ between both instruction conditions,  $p = .575$ .

63

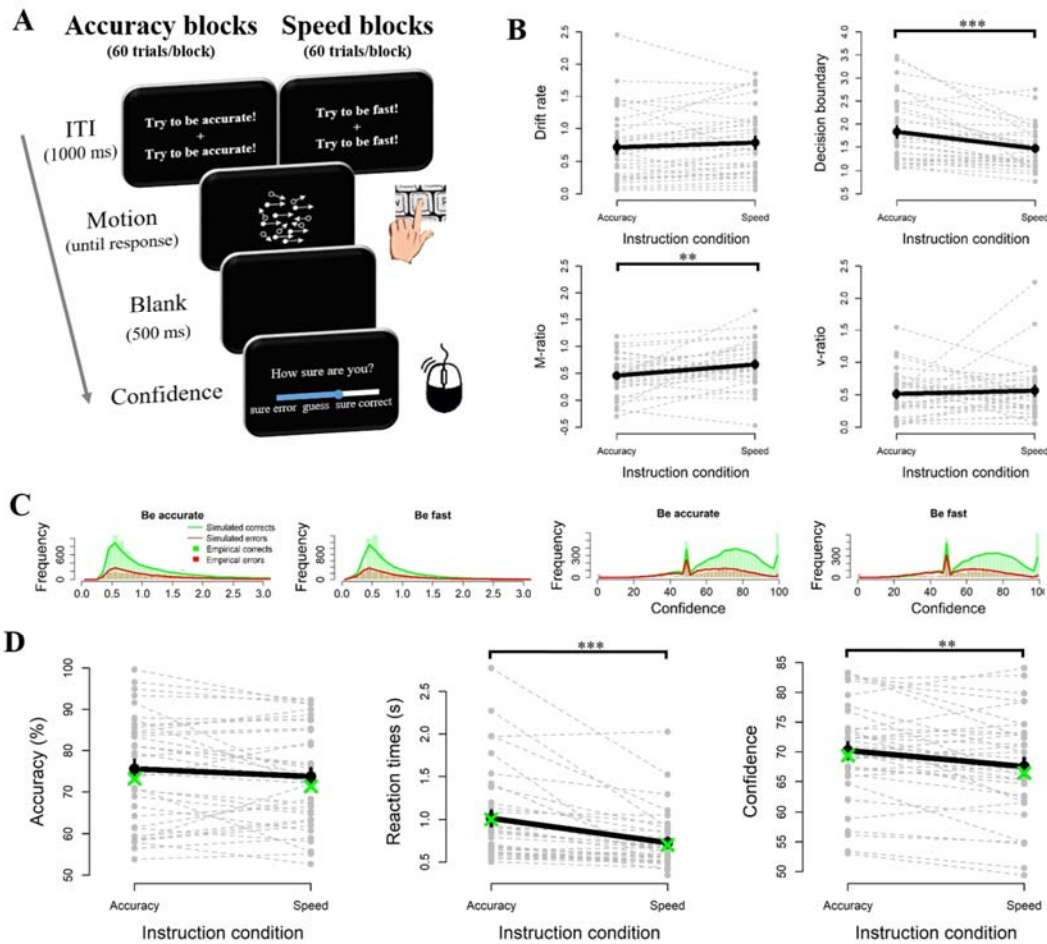

64

65 **Supplementary Figure 2. The influence of speed-accuracy instructions on metacognitive**  
 66 **accuracy.** **A.** Sequence of events in the experimental task. Participants ( $N=32$ ) decided whether the  
 67 majority of dots were moving left or right, by pressing “E” or “T” with their left hand. After a short  
 68 blank, they then indicated their level of confidence on a continuous scale. Depending on the block,  
 69 instructions during the ITI were either to focus on choice accuracy or to focus on speed. **B.** Fitted  
 70 parameters of a drift diffusion model with additional post-decision accumulation. Fitted decision  
 71 boundaries were lower in the speed vs accuracy condition,  $t(31) = 3.95$ ,  $p < .001$ , whereas drift rates  
 72 did not differ,  $p = .207$ . Critically, M-ratio was higher in the speed vs accuracy condition,  $t(31) =$   
 73  $2.95$ ,  $p = .005$ , whereas v-ratio did not differ between both instruction conditions,  $p = .575$ . **C.**  
 74 Distribution of reaction times and confidence for empirical data (bars) and model fits (lines),  
 75 separately for corrects (green) and errors (red). **D.** Participants were faster,  $t(31) = 4.12$ ,  $p < .001$ ,  
 76 and less confident,  $t(31) = 3.04$ ,  $p = .004$ , when instructed to focus on speed rather than on accuracy,  
 77 whereas accuracy itself did not significantly differ,  $t(31) = 1.31$ ,  $p = .20$ . Note: grey lines show  
 78 individual data points; black lines show averages; green dots show model fits; error bars reflect SEM;  
 79 \*\*\* $p < .001$ , \*\* $p < .01$ , \* $p < .05$ . Source data are provided as a Source Data file.

80

81

82

83 **Supplementary Note 2: Type II ROC as a function of post-decision drift rate**

84 Here, we further analyzed the simulations reported in the main manuscript, by calculating area  
85 under type II ROC for each simulated agent, and plotted this against the simulated post-decisional drift  
86 rate ( $v_{post}$ ). Supplementary Figure 3A shows four representative type II ROC plots for different levels of  
87 post-decision drift rate. As can be seen in Supplementary Figure 3B, area under type II ROC is strongly  
88 related to post-decision drift rate, reaching an asymptote when post-decision drift rate is around  $\sim 1.5$ .

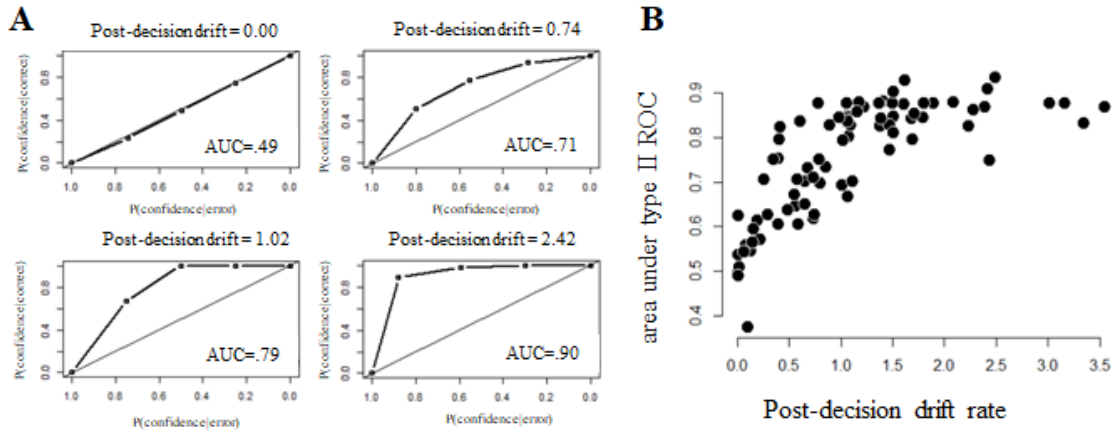

89

90 **Supplementary Figure 3.** Four representative type II ROC plots for different levels of post-  
91 decision drift rate (A). The relation between type II ROC performance and post-decision drift rate (B).

92 Supplementary Figure 3B suggests that when post-decision drift rate is zero, area under type II  
93 ROC is at chance level of .5. To further demonstrate this point, these simulations were performed again,  
94 but after fixing post-decision drift rate to zero. Indeed, these simulations showed that area under type II  
95 ROC does not significantly differ from .5,  $M = .499$ ,  $p = .807$ , *Bayes Factor* = 0.122. Thus, these  
96 additional simulations confirm that when post-decisional processing is zero, confidence judgments do  
97 not track the objective accuracy.

98

99

100
